# Supplementary material for: Single-cell transcriptomics of peripheral blood reveals anti-tumor systemic immunity induced by oncolytic virotherapy
Source: PubMed Central journal article supplement (PMC9691353; doi:10.7150/thno.74075), 2022-10-17
Supplement: thnov12p7371s1.pdf [file thnov12p7371s1.pdf]

**Figure S1**

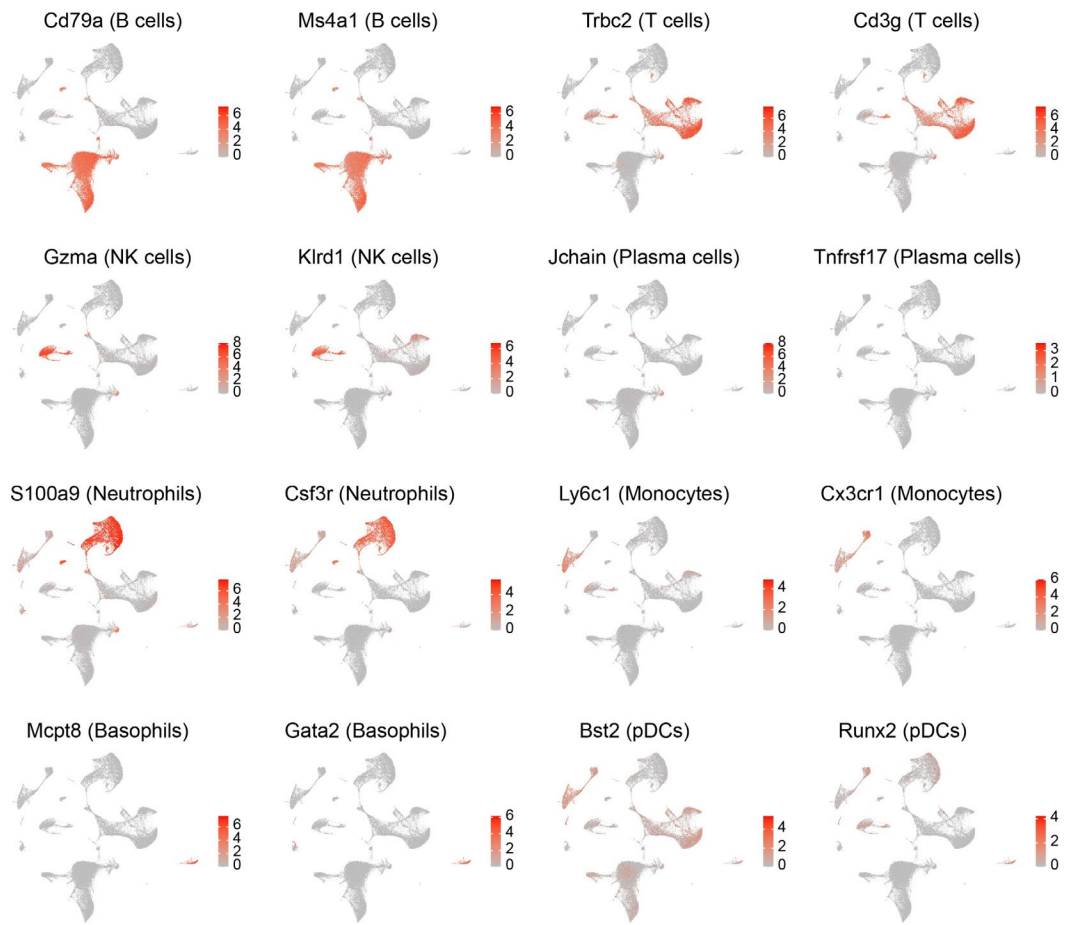

Fig. S1: Single cell gene expression for representative immune cell type-enriched genes.

Figure S2

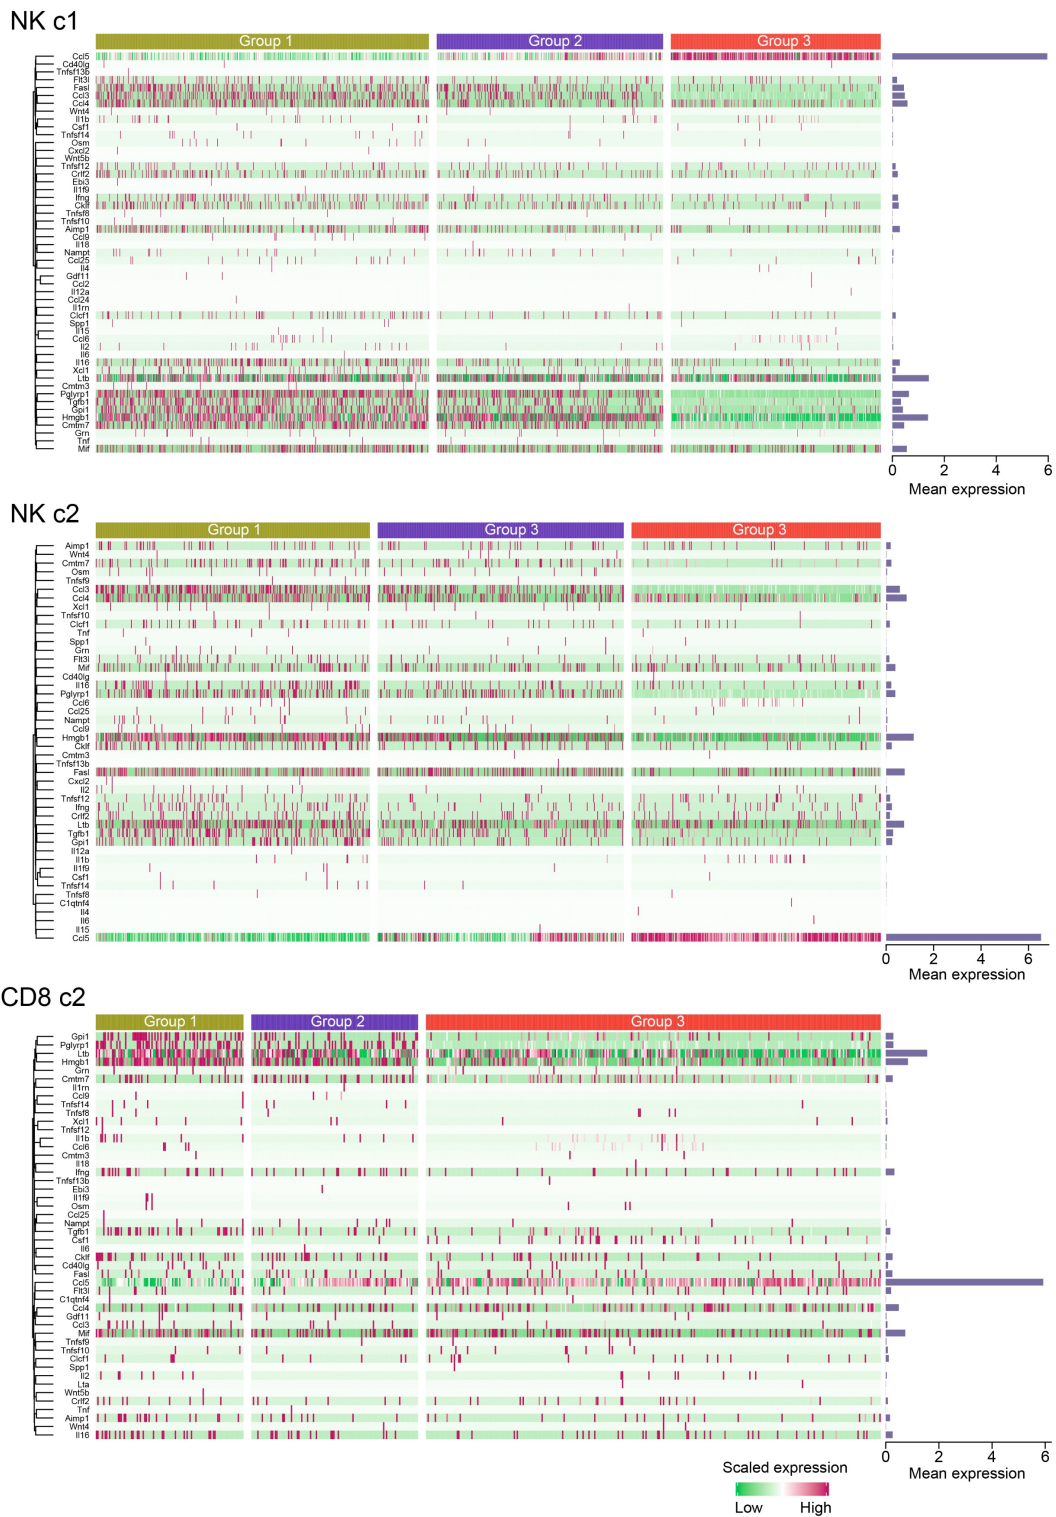

Fig.S2: Heatmaps showing the levels of cytokines produced by NK c1, NK c2, and CD8 c2. Bars represent the mean expression of each cytokine.
